# Supplementary material for: The impact of physiological metabolite levels on serine uptake, synthesis and utilization in cancer cells
Source: PubMed Central journal article supplement (PMC8548528; doi:10.1038/s41467-021-26395-5), 2021-10-26
Supplement: 41467_2021_26395_MOESM1_ESM.pdf [file 41467_2021_26395_MOESM1_ESM.pdf]

## **Supplementary Information**

**The impact of physiological metabolite levels on serine uptake, synthesis and utilization in cancer cells.**

Supplementary Table 1

| <b>Gene</b>   | <b>IDT Reference</b> | <b>Primer 1</b>                | <b>Primer 2</b>                  | <b>Probe</b>                                                  |
|---------------|----------------------|--------------------------------|----------------------------------|---------------------------------------------------------------|
| <b>ASCT1</b>  | Hs.PT.58.4102571     | CAT CCC CTT CCA CAT<br>TCA CC  | CCT CAC CAT TGC CAT<br>TAT CCT   | /56-FAM/TCC ACA ATC<br>/ZEN/CAG TCC ACA GCC<br>AG/3IABkFQ/    |
| <b>ASCT2</b>  | Hs.PT.58.21358468    | CCA TTA TTC TCC TCC<br>ACG CA  | CCT CAT CTA CTT CCT<br>CTT CAC C | /56-FAM/CCA CGC TGC<br>/ZEN/CGC TGA TGA<br>TG/3IABkFQ/        |
| <b>POLR2A</b> | Hs.PT.39a.19639531   | TCG TCT CTG GGT ATT<br>TGA TGC | CAG TTC GGA GTC CTG<br>AGT C     | /56-FAM/ACT GAA GCG<br>/ZEN/AAT GTC TGT GAC GGA<br>G/3IABkFQ/ |

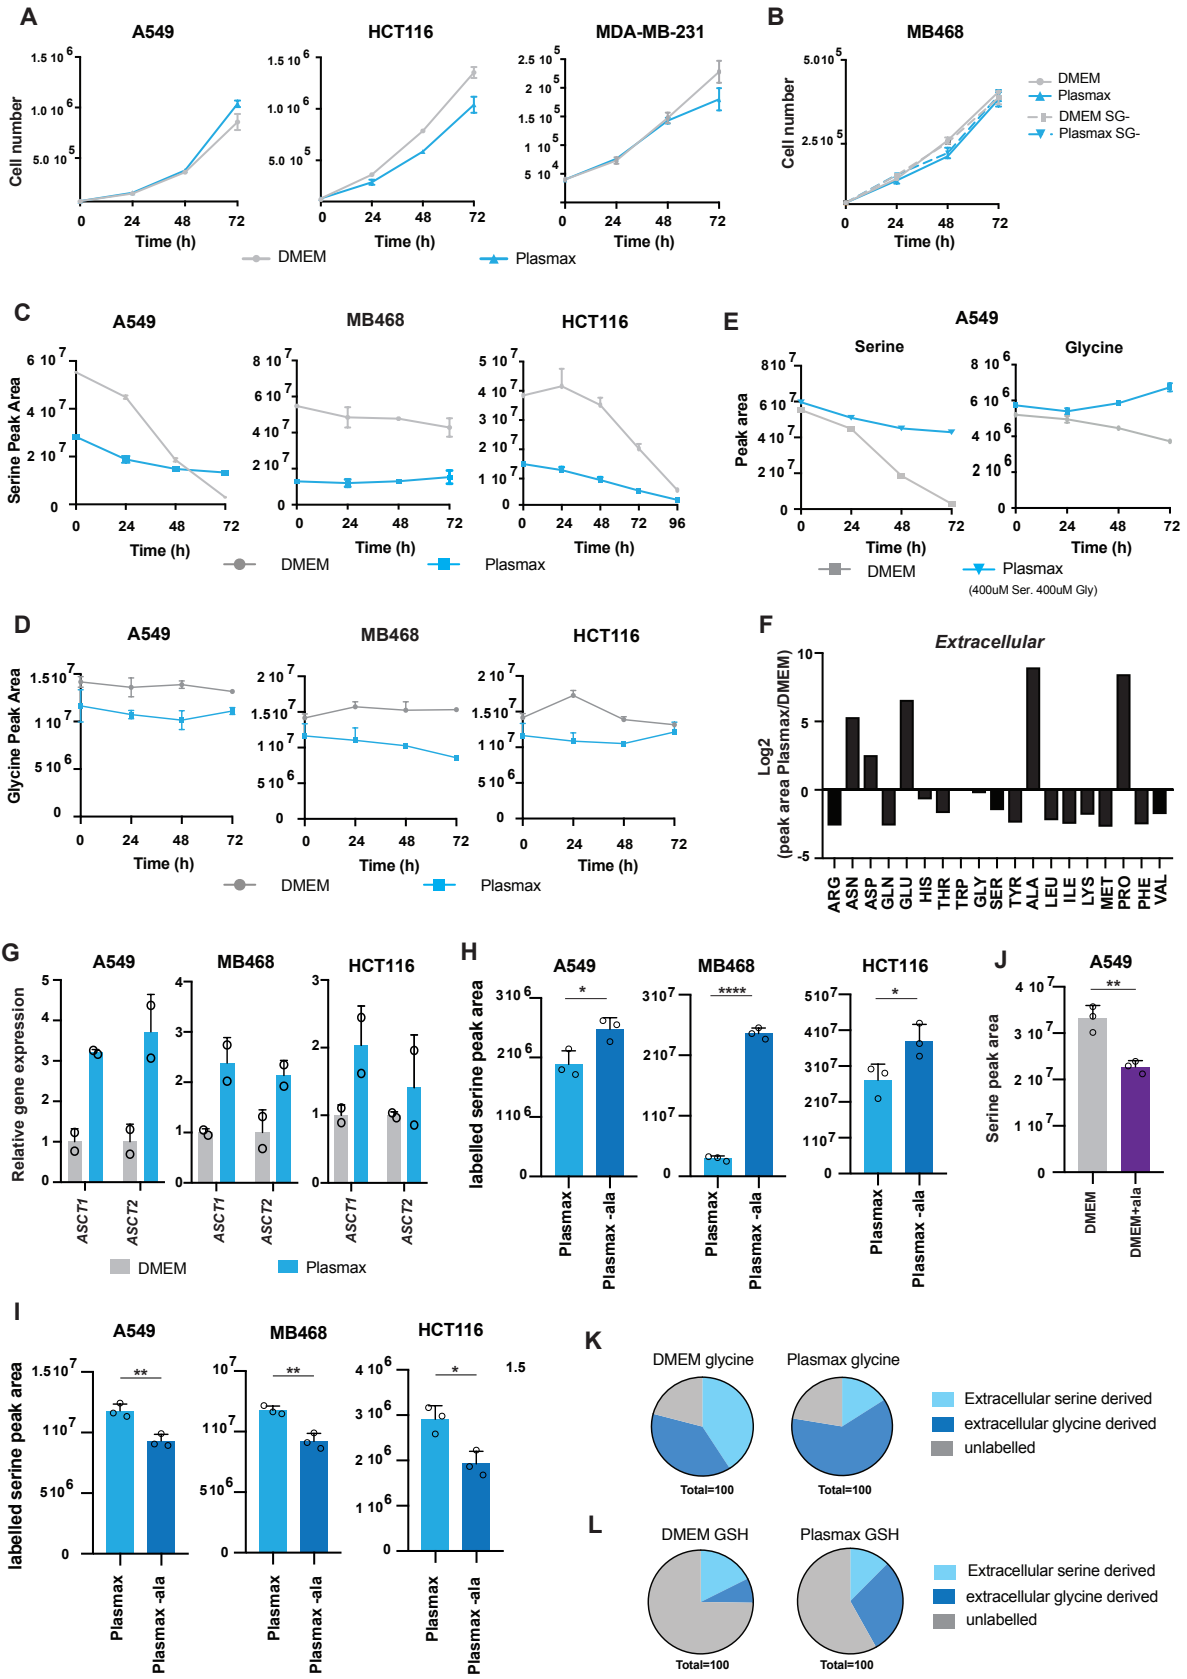

**Supplementary Figure 1:** (A) Growth curve of cells grown in complete DMEM (grey) or Plasmax (blue). (B) Growth curve of serine deprivation-resistant MDA-MB-468 in DMEM (grey) or Plasmax (blue) lacking or not serine and glycine (SG-). (C) Extracellular levels of serine measured by LC-MS in supernatants of cells grown in DMEM (grey) or Plasmax (blue). (D) Extracellular levels of glycine measured by LC-MS in supernatants of cells grown in DMEM (grey) or Plasmax (blue). (E) Extracellular levels of serine and glycine measured by LC-MS of cells grown in DMEM (grey) or Plasmax (400 $\mu$ M SER, 400 $\mu$ M GLY) (blue) modified to contain the same levels of serine and glycine present in DMEM (400  $\mu$ M of serine and glycine). (F) Representation of the ratio of the amino acid peak areas normalized to tryptophan (present at the same concentration in both media) in Plasmax/DMEM measured by LC-MS. (G) RT-qPCR of *ASCT1 (SLC1A4)* and *ASCT2 (SLC1A5)* in cells grown in DMEM (grey) or Plasmax (blue) for 72 h. (H) Intracellular levels of 2,3,3-D<sub>3</sub>-serine measured by LC-MS after cells were grown 24 h in Plasmax (light blue) or Plasmax depleted in alanine (dark blue) (unpaired Student *t* test, \**p*<0.05, \*\*\*\**p*<0.0001). (I) Extracellular levels of <sup>13</sup>C<sub>3</sub> <sup>15</sup>N-Serine measured by LC-MS after cells were grown 24h in Plasmax (light blue) or Plasmax depleted in Alanine (dark blue) (unpaired Student *t* test, \**p*<0.05, \*\**p*<0.01). (J) Intracellular levels of serine measured by LC-MS after cells were grown 24 h in DMEM (grey) or DMEM supplemented with 500  $\mu$ M alanine (purple) (unpaired Student *t* test, \*\**p*<0.01). (K) A549 cells were separately incubated with 400  $\mu$ M or 140  $\mu$ M of 2,3,3-D<sub>3</sub>-serine and 400  $\mu$ M or 330  $\mu$ M of 2,2-D<sub>2</sub>-glycine for 4h in DMEM or Plasmax, respectively. Percentage of glycine derived from 2,3,3,-D<sub>3</sub>-serine and extracellular 2,2-D<sub>2</sub>-glycine were plotted as parts of whole. (L) A549 cells were separately incubated with 400  $\mu$ M or 140  $\mu$ M of 2,3,3-D<sub>3</sub>-serine and 400  $\mu$ M or 330  $\mu$ M of 2,2-D<sub>2</sub>-glycine for 4h in DMEM or Plasmax, respectively. Percentage of glutathione derived from extracellular 2,3,3-D<sub>3</sub>-serine and extracellular 2,2-D<sub>2</sub>-glycine were plotted as parts of whole. Data are represented as mean  $\pm$  SD of triplicate wells and are representative of 3 independent experiments. Supplementary Figure 1G is represented as mean  $\pm$  SD of duplicate wells and is representative of 3 independent experiments.

Source data are provided as a Source Data file.

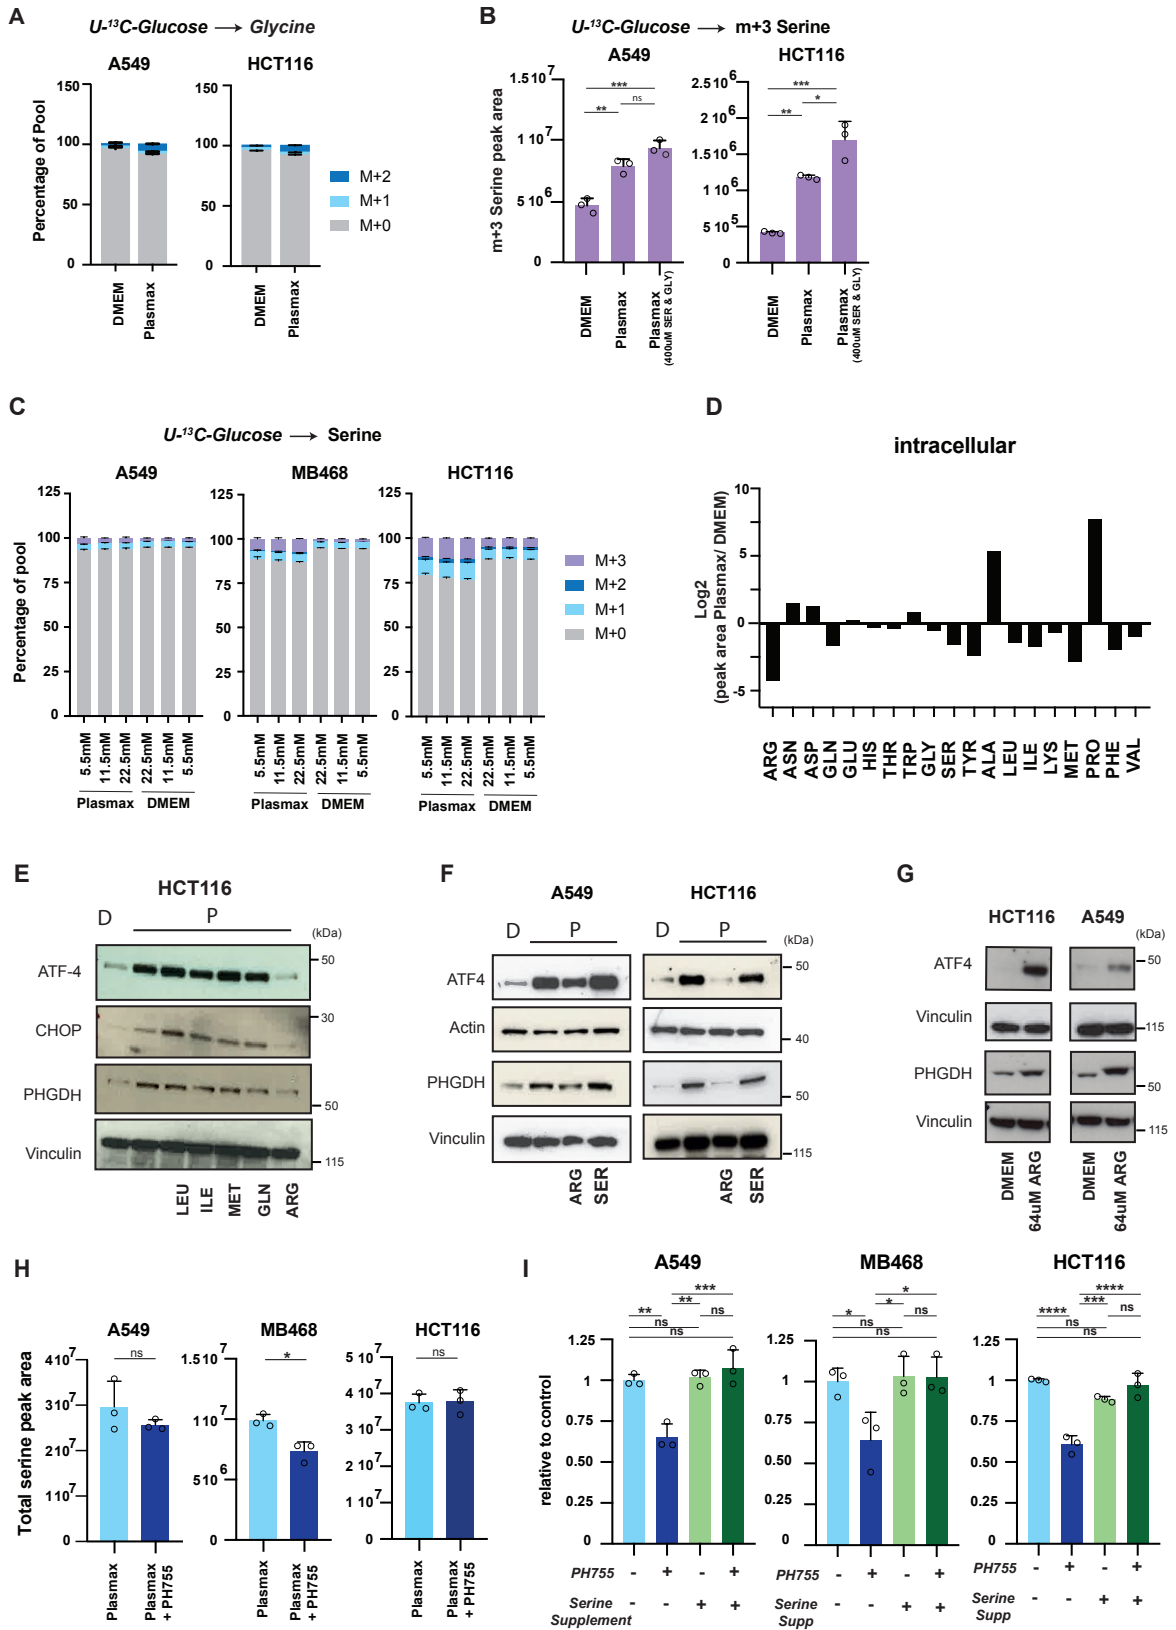

**Supplementary Figure 2:** (A) Percentage of pool of intracellular glycine measured by LC-MS after incubation for 4 h with 22.5 mM or 5.5 mM of U-<sup>13</sup>C-glucose in DMEM or Plasmax, respectively. Data are represented as mean ± SD of triplicate wells. (B) Intracellular levels of M+3 serine of cells grown in DMEM, Plasmax or Plasmax (400μM SER, 400μM GLY) and incubated 4 h with 22.5 mM, 5.5 mM or 5.5 mM of U-<sup>13</sup>C-glucose in DMEM, Plasmax or Plasmax (400μM SER, 400μM GLY) respectively. Data are represented as mean ± SD of triplicate wells (Multiple comparison by one-way Anova, \*p<0.05, \*\*p<0.01, \*\*\*p<0.001, ns: no significance). (C) Percentage of pool of intracellular M+3 serine measured by LC-MS after incubation for 4 h with different concentrations of U-<sup>13</sup>C-glucose in DMEM or Plasmax. Data are represented as mean ± SD of triplicate wells. (D) Representation of the ratio of intracellular amino acid levels in Plasmax/DMEM measured by LC-MS. (E) Western blot of HCT116 cells grown for 24h in DMEM (D) or Plasmax (P) supplemented with 630 μM leucine (LEU), 660μM isoleucine (ILE), 170μM methionine (MET), 1350μM glutamine (GLN) and 436μM arginine (ARG). Membrane was cut and ATF4, PHGDH and CHOP were probed and membrane was reprobed with vinculin as loading control. (F) Western blot of cells grown for 24 h in DMEM (D) or Plasmax (P) supplemented with 436 μM of arginine (ARG) or 260 μM of serine (SER) in order to recapitulate DMEM levels of arginine (500 μM) or serine (400 μM). Membranes were reprobed with Actin for ATF-4 blot and Vinculin for PHGDH blot as loading control. (G) Western blot of cells grown for 24 h in DMEM or DMEM 64 μM of arginine (64 μM ARG). Membrane was reprobed with vinculin as loading control. (H) Total serine peak area was measured in cells that were incubated 24h in Plasmax (light blue) alone or treated with 10μM of PH755 (dark blue). Data are represented as mean ± SD of triplicate wells (unpaired Student *t* test, \*p<0.05, ns: no significance). (I) Growth fold change relative to the full Plasmax condition (PH755-/Serine Supp -) after 72 h of proliferation in the different conditions. When indicated cells were treated with 10μM of PH755 and supplemented with 400μM of exogenous serine. PH755-/Serine Supp- (light blue), PH755+/Serine Supp- (dark blue), PH755-/Serine Supp+ (light green), PH755+/Serine Supp+ (dark green). Data are represented as mean ± SD of triplicate wells (Multiple comparison by one-way Anova, \*p<0.05, \*\*p<0.01, \*\*\*p<0.001, \*\*\*\*p<0.0001). All graph are representative of 3 independent experiments and blots are representative of 2 independent experiments. Source data are provided as a Source Data file.

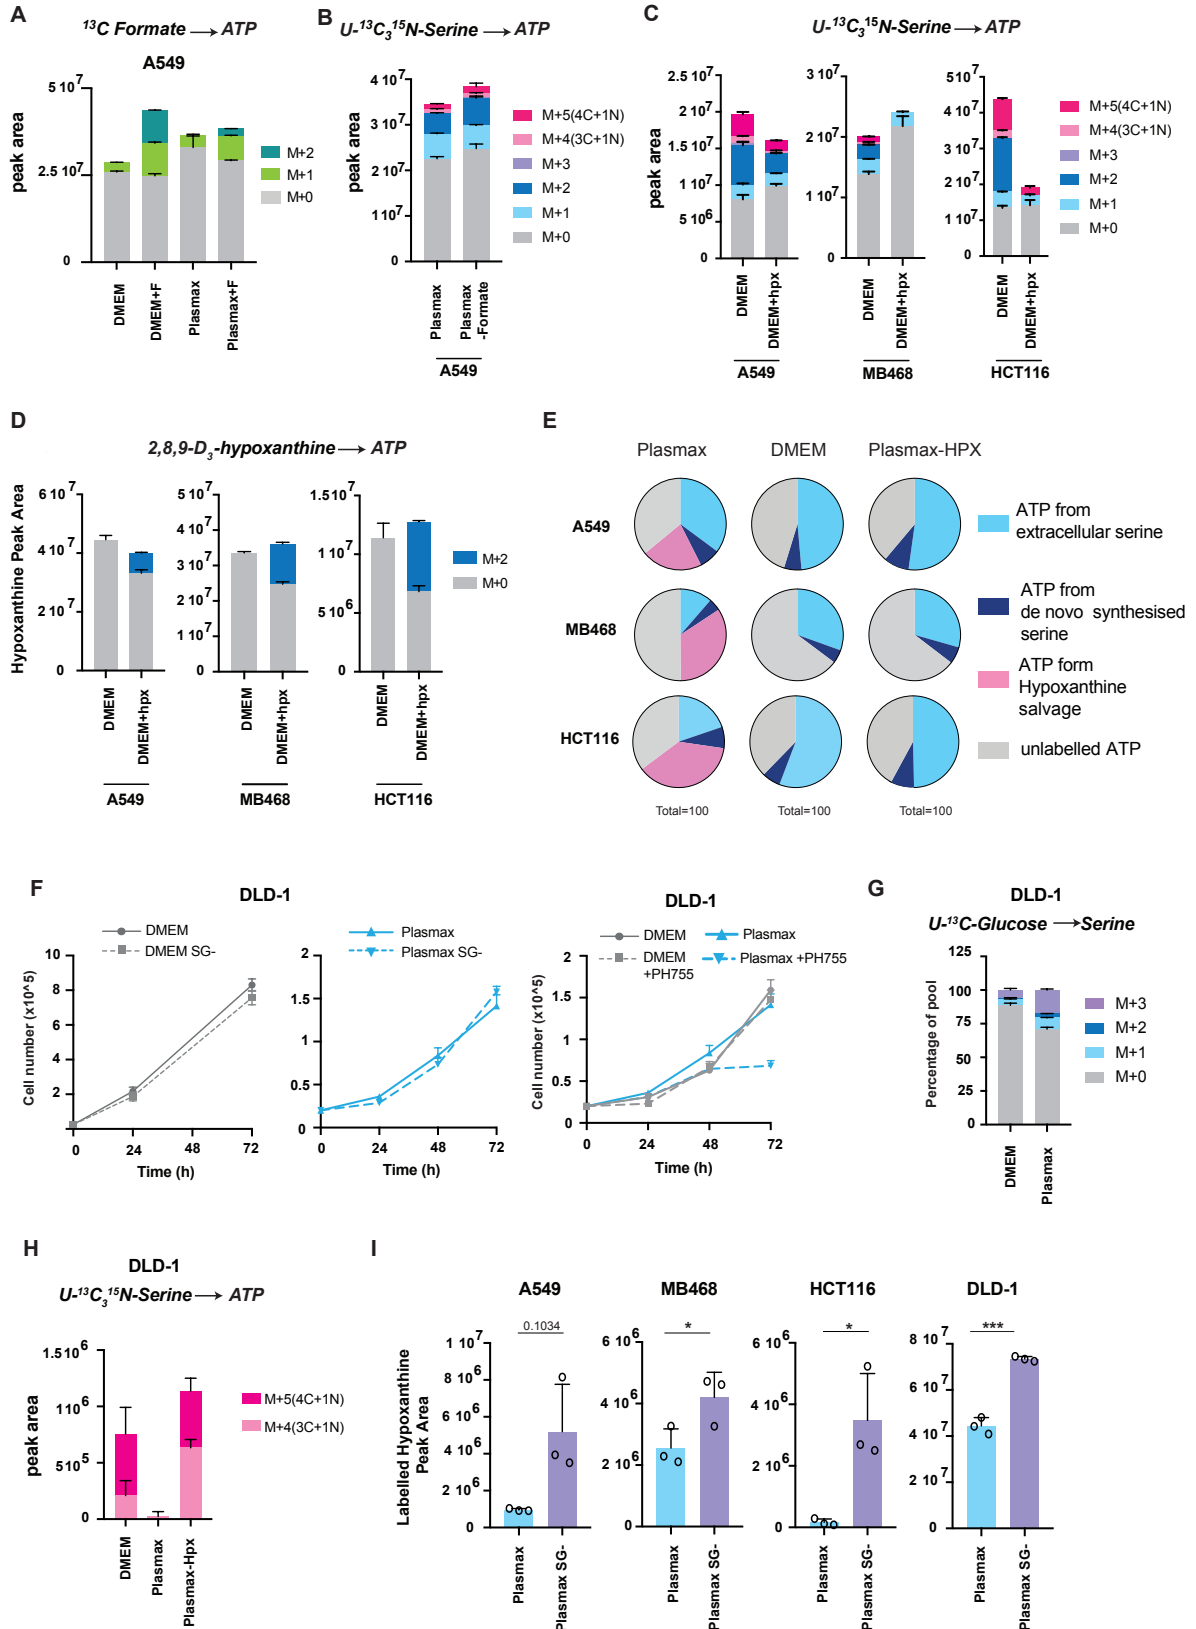

**Supplementary Figure 3:** (A) Intracellular levels of ATP measured by LC-MS in cells incubated for 4 h with 33  $\mu\text{M}$  of  $^{13}\text{C}$ -formate (+F). In cells grown in Plasmax, non-labelled formate was removed and replaced by  $^{13}\text{C}$ -formate (+F). Data are represented as mean  $\pm$  SD of triplicate wells. (B) Intracellular levels of ATP measured by LC-MS in cells grown in Plasmax and deprived or not of formate and incubated for the last 4 h with 140  $\mu\text{M}$  of  $^{13}\text{C}_3$ - $^{15}\text{N}$ -serine. Data are represented as mean  $\pm$  SD of triplicate wells. (C) Intracellular levels of ATP after cells were grown in DMEM and DMEM supplemented with 5  $\mu\text{M}$  hypoxanthine and incubated for 4 h with 400  $\mu\text{M}$  of  $^{13}\text{C}_3$ - $^{15}\text{N}$ -serine. Data are represented as mean  $\pm$  SD of triplicate wells. (D) Intracellular levels of ATP in cells incubated for 4 h with or without 5  $\mu\text{M}$  2,8,9-D<sub>3</sub>-hypoxanthine in DMEM. Data are represented as mean  $\pm$  SD of triplicate wells (E) Cells were incubated separately for 4 h with 22.5 mM or 5.5 mM of U- $^{13}\text{C}$ -glucose, 400  $\mu\text{M}$  or 140  $\mu\text{M}$  of  $^{13}\text{C}_3$ - $^{15}\text{N}$ -serine and 0  $\mu\text{M}$  or 5  $\mu\text{M}$  of 2,8,9-D<sub>3</sub>-hypoxanthine in DMEM and Plasmax, respectively. Percentage of pools of ATP derived from U- $^{13}\text{C}$ -glucose-derived serine (ATP+4/+6/+7/+8), extracellular  $^{13}\text{C}_3$ - $^{15}\text{N}$ -serine (ATP+1/+2/+3/+4/+5) and 2,8,9-D<sub>3</sub>-hypoxanthine were plotted as parts of whole. (F) Growth curve of DLD-1 cells grown in DMEM (grey), DMEM SG-, Plasmax (blue) and Plasmax SG- or DMEM and Plasmax with or without 10  $\mu\text{M}$  of PH755. Data are represented as mean  $\pm$  SD of triplicate wells. (G) Percentage of pool of intracellular serine measured by LC-MS after incubation for 4h with 22.5 mM or 5.5 mM of U- $^{13}\text{C}$ -glucose in DMEM or Plasmax, respectively. Data are represented as mean  $\pm$  SD of triplicate wells. (H) Intracellular levels of ATP measured by LC-MS after incubation for 4 h with 400  $\mu\text{M}$ , 140  $\mu\text{M}$  or 140  $\mu\text{M}$  of  $^{13}\text{C}_3$ - $^{15}\text{N}$ -Serine in DMEM, Plasmax or Plasmax-hpx, respectively. Data are represented as mean  $\pm$  SD of triplicate wells. (I) Intracellular levels of 2,8,9-D<sub>3</sub>-hypoxanthine measured by LC-MS. Cells were grown 24 h in the different media conditions, Plasmax (blue) and Plasmax SG- (purple), before incubation with 5  $\mu\text{M}$  of 2,8,9-D<sub>3</sub>-hypoxanthine for the last 4 h. Data are represented as mean  $\pm$  SD of triplicate wells (unpaired Student *t* test for DLD-1 and MB468, Welch correction was applied for A549 and HCT116 \**p*<0.05, \*\*\**p*<0.001). All panels are representative of 3 independent experiments. Source data are provided as a Source Data file.



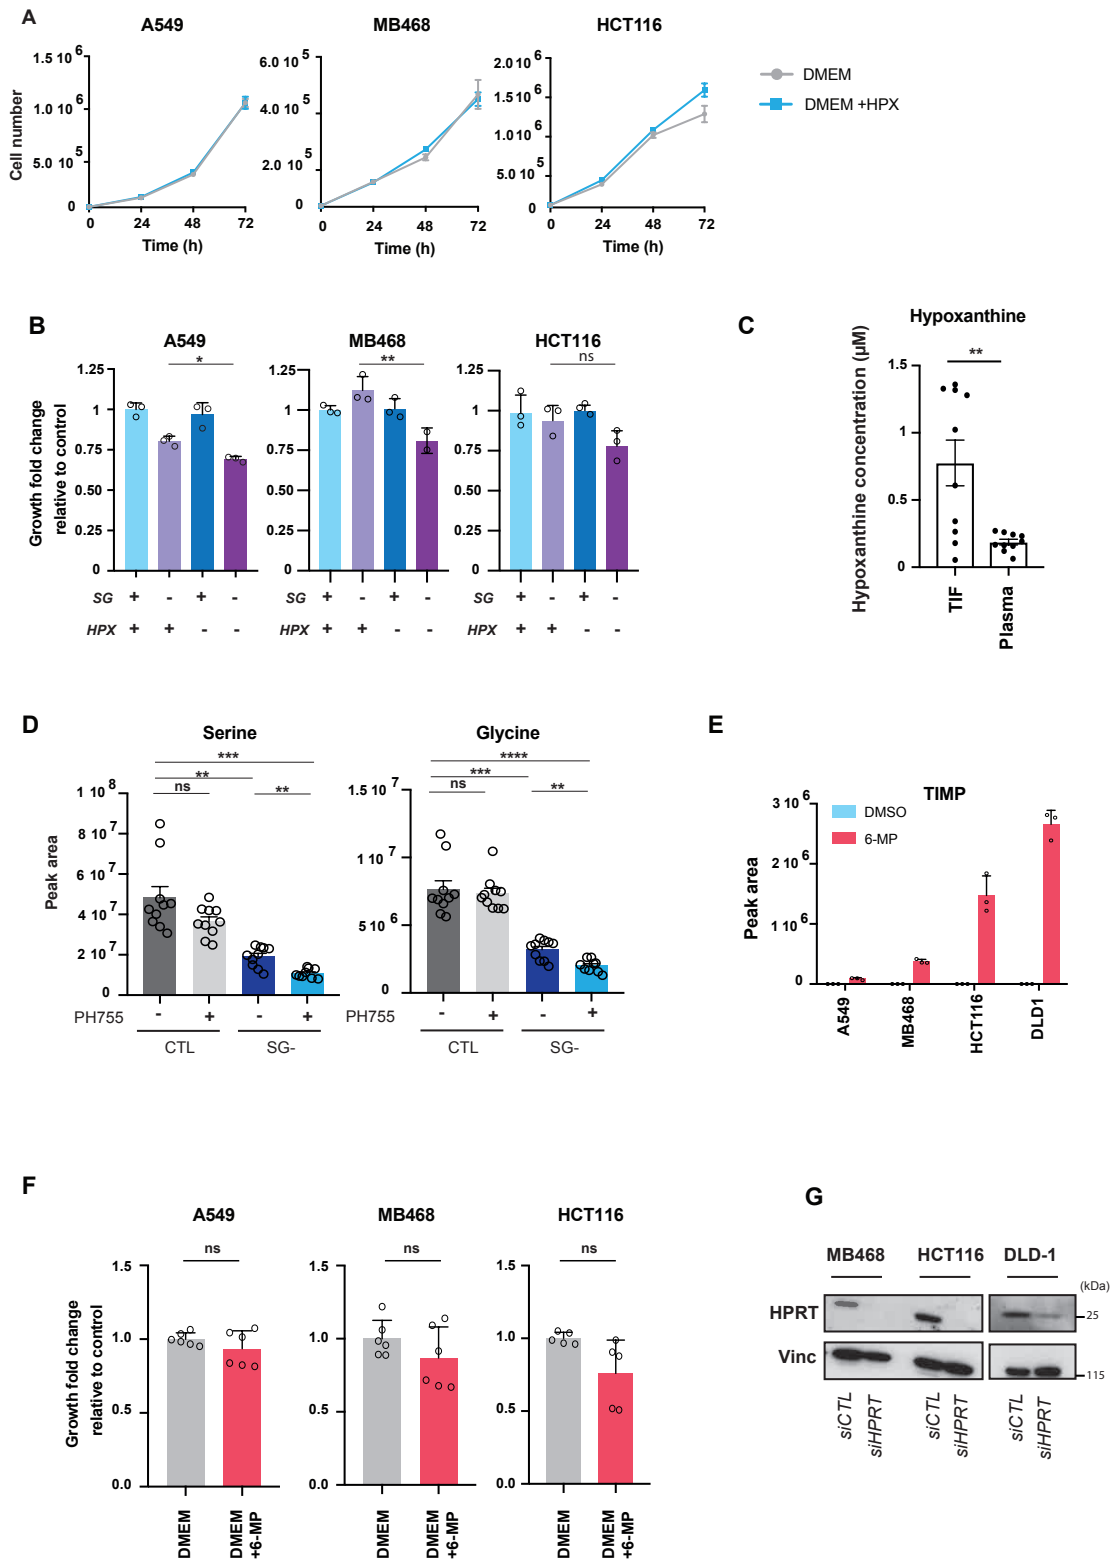

**Supplementary Figure 4:** (A) Growth curve of cells grown in complete DMEM (grey) or DMEM supplemented with 5  $\mu$ M hypoxanthine (+HPX) (blue). Data are represented as mean  $\pm$  SD of triplicate wells and representative of 3 independent experiments. (B) Growth fold change relative to the full Plasmax condition (SG+/HPX+) after 72 h of proliferation in the different conditions. SG+/HPX+ (light blue), SG-/HPX+ (light purple), SG+/HPX- (dark blue), SG-/HPX- (dark purple). Data are represented as mean  $\pm$  SD of triplicate wells and representative of 3 independent experiments (Direct comparison by unpaired Student *t* test, \**p*<0.05, \*\**p*<0.01, ns: no significance). (C) Hypoxanthine quantification in plasma and tumour interstitial fluid (TIF) from NSG mice with DLD-1 cell xenograft measured by LC-MS. Data are represented as mean  $\pm$  SEM of 10 mice (unpaired Student *t* test with Welch correction \**p*<0.05). (D) Levels of serine and glycine measured by LC-MS in plasma collected at end-point from DLD-1 xenograft bearing mice fed with control with vehicle (n=10) ( light grey) or PH755 (n=10) (dark grey) or serine/glycine free diet with vehicle (n=10) (dark blue) or PH755 (n=9) (light blue). Data are represented as mean  $\pm$  SEM ( Multiple comparison by one-way Anova with Brown-Forsythe and Welch correction, \**p*<0.05, \*\**p*<0.01, \*\*\**p*<0.001, \*\*\*\**p*<0.0001, ns: no significance). These data have been previously published in Tajan et al, 2021 (doi: 10.1038/s41467-020-20223-y). (E) 6-thio-losinic acid (TIMP) levels after 2 hour incubation with 2.5 $\mu$ M of 6-MP (red) or DMSO (blue). Data are represented as mean  $\pm$  SD of triplicate wells and representative of two independent experiments. (F). Growth fold change relative to DMEM control condition (grey) after 72 h of proliferation. Cells were treated with 2.5 $\mu$ M of 6-MP (red). Data are represented as mean  $\pm$  SD and pooled form two independent experiments containing 2 to 3 replicate wells (unpaired Student *t* test for MB468 and with Welch correction for A549 and HCT116, ns: no significance). (G) Cells were transfected with siHPRT1 or non-targeting siRNA. Protein lysate was harvested at 72h after transfection. Membrane was reprobred with vinculin as loading control. Blots are representative of 3 independent experiments.

Source data are provided as a Source Data file.
